# Supplementary material for: Enhanced CAR T cell expansion and prolonged persistence in pediatric patients with ALL treated with a low-affinity CD19 CAR
Source: Springer Nature journal article supplement (doi:10.1038/s41591-019-0549-5), 2019-09-01
Supplement: 41591_2019_549_MOESM1_ESM.pdf [file 41591_2019_549_MOESM1_ESM.pdf]

In the format provided by the authors and unedited.

# Enhanced CAR T cell expansion and prolonged persistence in pediatric patients with ALL treated with a low-affinity CD19 CAR

Sara Ghorashian<sup>1</sup>, Anne Marijn Kramer<sup>1</sup>, Shimobi Onuoha<sup>2</sup>, Gary Wright<sup>3</sup>, Jack Bartram<sup>3</sup>, Rachel Richardson<sup>1</sup>, Sarah J. Albon<sup>1</sup>, Joan Casanovas-Company<sup>1</sup>, Fernanda Castro<sup>4</sup>, Bilyana Popova<sup>4</sup>, Krystle Villanueva<sup>4</sup>, Jenny Yeung<sup>1</sup>, Winston Vetharoy<sup>1</sup>, Aleks Guvenel<sup>1</sup>, Patrycja A. Wawrzyniecka<sup>5</sup>, Leila Mekkaoui<sup>2</sup>, Gordon Weng-Kit Cheung<sup>5</sup>, Danielle Pinner<sup>3</sup>, Jan Chu<sup>3</sup>, Giovanna Lucchini<sup>3</sup>, Juliana Silva<sup>3</sup>, Oana Ciocarlie<sup>3</sup>, Arina Lazareva<sup>3</sup>, Sarah Inglott<sup>3</sup>, Kimberly C. Gilmour<sup>6</sup>, Gulrukh Ahsan<sup>6</sup>, Mathieu Ferrari<sup>2</sup>, Somayya Manzoor<sup>2</sup>, Kim Champion<sup>4</sup>, Tony Brooks<sup>7</sup>, Andre Lopes<sup>4</sup>, Allan Hackshaw<sup>4</sup>, Farzin Farzaneh<sup>8</sup>, Robert Chiesa<sup>3</sup>, Kanchan Rao<sup>3</sup>, Denise Bonney<sup>9</sup>, Sujith Samarasinghe<sup>3</sup>, Nicholas Goulden<sup>3</sup>, Ajay Vora<sup>3</sup>, Paul Veys<sup>3</sup>, Rachael Hough<sup>10</sup>, Robert Wynn<sup>9</sup>, Martin A. Pule<sup>5</sup> and Persis J. Amrolia<sup>1,3\*</sup>

<sup>1</sup>Molecular and Cellular Immunology Section, UCL Great Ormond Street Institute of Child Health, London, UK. <sup>2</sup>Autolus Ltd, London, UK. <sup>3</sup>Departments of Bone Marrow Transplant and Haematology, Great Ormond Street Hospital for Children, London, UK. <sup>4</sup>Cancer Research UK & UCL Cancer Trials Centre, London, UK. <sup>5</sup>Cancer Institute, University College London, London, UK. <sup>6</sup>Cell Therapy and Immunology laboratories, Great Ormond Street Hospital for Children, London, UK. <sup>7</sup>University College London Genomics, London, UK. <sup>8</sup>Department of Haematological Medicine, King's College London, London, UK. <sup>9</sup>Department of Blood and Marrow Transplant, Royal Manchester Children's Hospital, Manchester, UK. <sup>10</sup>Department of Haematology, University College London Hospitals NHS Trust, London, UK. \*e-mail: [Persis.Amrolia@gosh.nhs.uk](mailto:Persis.Amrolia@gosh.nhs.uk)

# Supplementary Figure 1

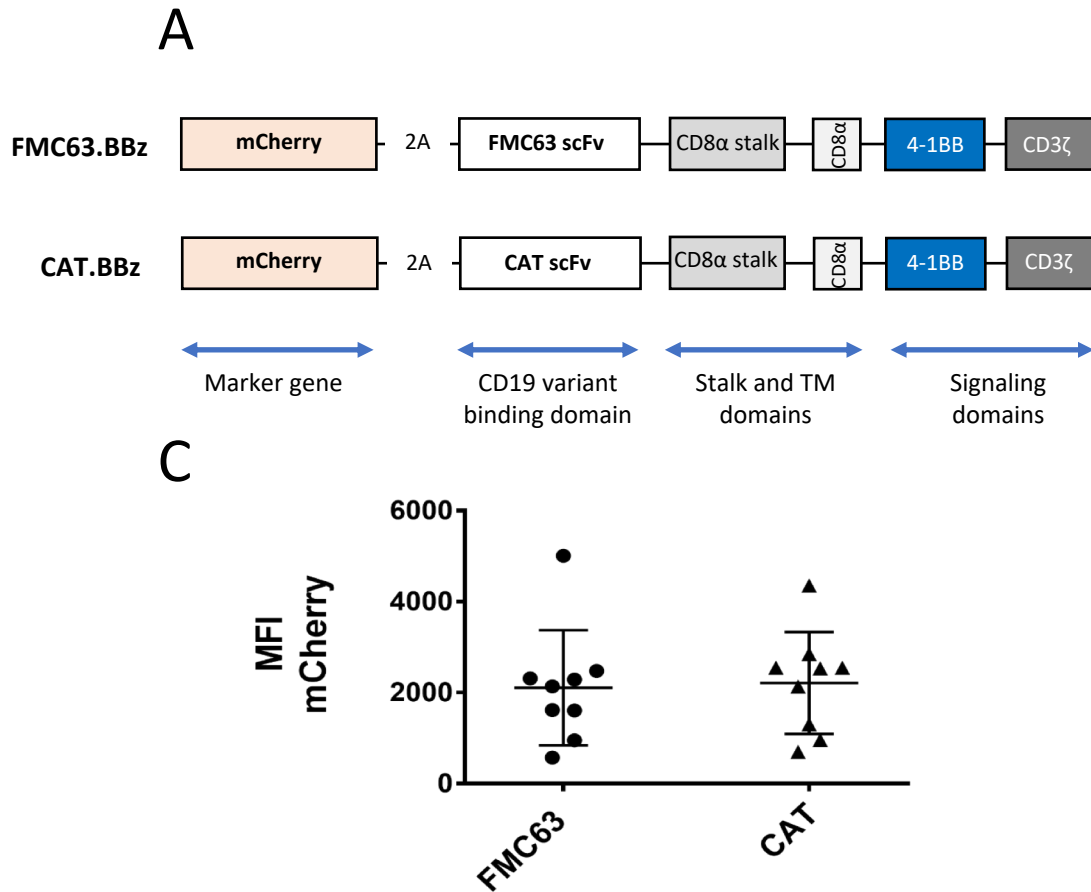

## Supplementary Figure 1. Expression of Chimeric Antigen Receptor is identified by transgene expression and binding to recombinant CD19 soluble protein.

(A) Schematic representation of CD19 CARs. Both CAR constructs contain an aCD19 scFv, from either the FMC63 or CAT hybridoma, a CD8 transmembrane domain, a CD137 (4-1BB) costimulatory domain, and a CD3  $\zeta$ - signalling domain co-expressed with mCherry as a marker of transduction (B) Transduction efficiency of activated CD3/CD28 bead-expanded human T cells transduced with bi-cistronic lentiviral vectors shown in (A). The panel shows detection of CAR using mCherry transgene expression (x-axis) and a recombinant CD19 protein with an Fc tag construct (y-axis). Data are representative of >20 independent experiments. Similar levels of CAR expression as measured by median fluorescence intensity of mCherry were observed (MFI FMC63 2476, MFI CAT 2132 in representative FACS plot), but a lower MFI for rCD19 in CAT CAR, in accordance with its lower affinity for CD19 (MFI FMC63 7680, MFI CAT 4831); (C) Transgene expression, as measured by MFI of mCherry was determined 7 days-post transduction with bicistronic vectors expressing aCD19 CAR (FMC63 or CAT CAR) and mCherry. Data shown as mean  $\pm$  SD. No significant difference was noted,  $n=9$ .

# Supplementary Figure 2

A

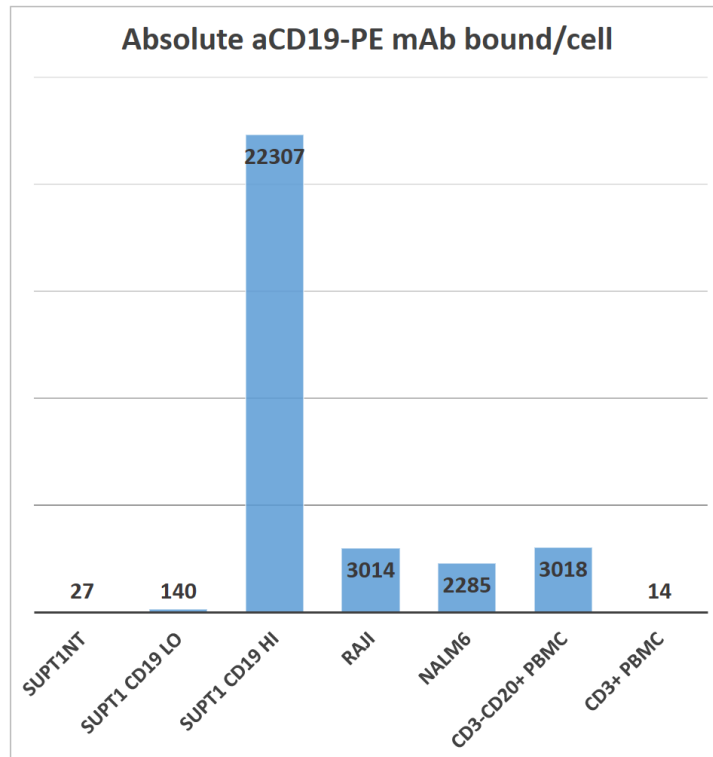

B

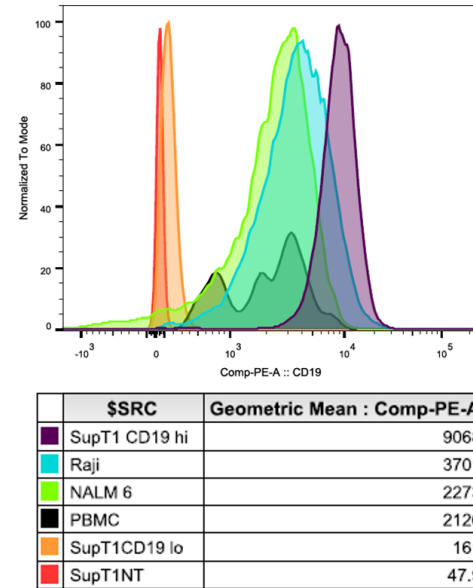

C

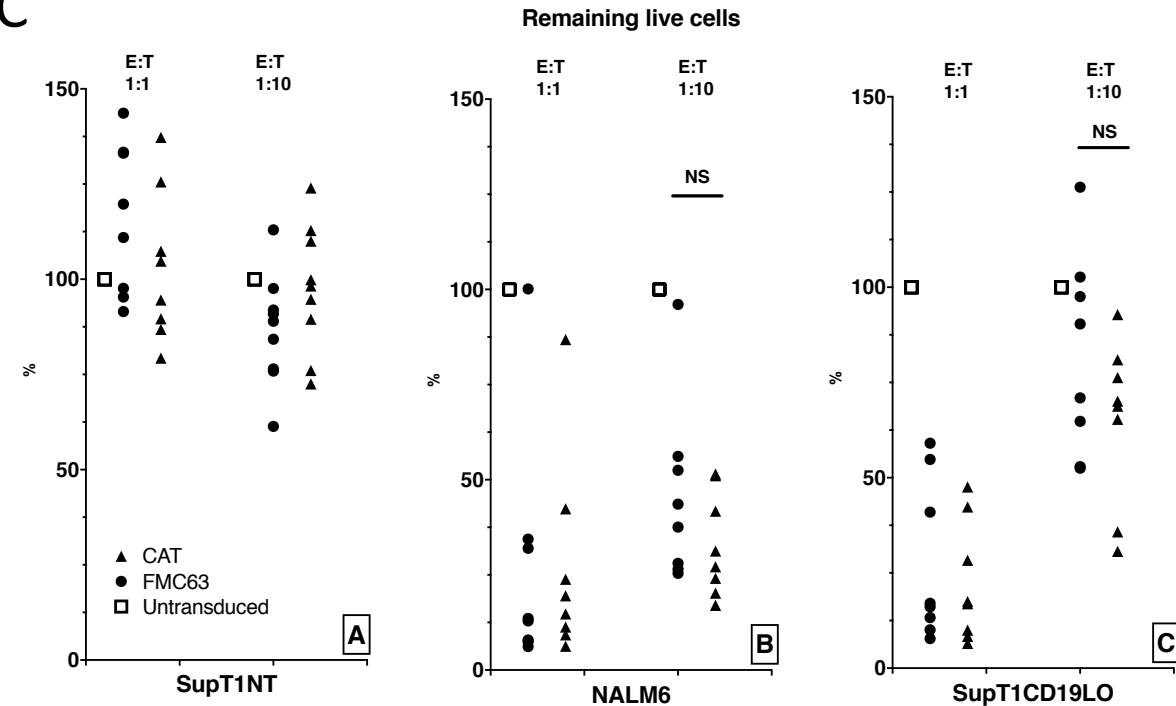

## Supplementary Figure 2. 24-hr Cytotoxicity assay by flow cytometry at 1:1 and 1:10 E:T ratio to investigate CAR T cell functional avidity

Flow-cytometric quantification of CD19 expression levels on target cells using the PE-QuantIBRITE kit. Cell lines assessed included SupT1NT, a T lymphoblastic cell line which does not express CD19, SupT1 cells transduced to express varying densities of CD19, including SupT1CD19LO cells and SupT1CD19HI, as well as Raji, NALM-6 cell lines and peripheral blood B cells which express CD19 at intermediate levels. Absolute CD19 PE mAb bound/cell SupT1NT 27, SupT1CD19LO 140, NALM-6 2285 depicted as bar chart (A) and as distribution of CD19 expression (B, x-axis = CD19). (C) CAR+ T cells were incubated at 1:1 and 1:10 E:T ratios with non-irradiated target cells (SupT1NT, SupT1CD19LO and NALM6) for 24 hours. The remaining live cell fraction was calculated relative to the live cell fraction in the well co-cultured with non-transduced T cells. At a 1:1 ratio against NALM-6 the mean % remaining live fraction  $\pm$  SEM was: CAT  $26.77 \pm 9.47$ , FMC63  $26.82 \pm 11.17$ ,  $n=8$ ,  $p=0.84$ . Against SupT1CD19LO the mean % remaining live fraction  $\pm$  SEM was: CAT  $21.08 \pm 5.02$ , FMC63  $28.57 \pm 6.621$ ,  $n=8$ ,  $p=0.16$ . At a 1:10 ratio against NALM 6 the mean % remaining live fraction  $\pm$  SEM was: CAT  $38.61 \pm 7.007$ , FMC63  $51.23 \pm 9.161$ ,  $n=8$ ,  $p=0.16$ . Against SupT1CD19LO the mean % remaining live fraction  $\pm$  SEM was: CAT  $67.98 \pm 7.29$ , FMC63  $84.23 \pm 8.429$ ,  $n=8$ ,  $p=0.13$ . Comparisons were analysed using two-tailed Wilcoxon matched-pairs signed rank test (non-parametric paired t-test)

### **Inclusion criteria**

1. Children and young adults (age 24 years or younger) with high risk/relapsed CD19+ haematological malignancy:
  - a) Resistant disease (>25% blasts) at end of UKALL 2011 or equivalent induction
  - b) ALL with persistent high level MRD at 2nd time point of frontline national protocol (currently  $> 5 \times 10^{-3}$  at week 14 UKALL2011 or equivalent)
  - c) High risk infant ALL (age < 6 months at diagnosis with MLL gene rearrangement and either presenting white cell count  $> 300 \times 10^9/L$  or poor steroid early response (i.e. circulating blast count  $> 1 \times 10^9/L$  following 7 day steroid pre-phase of Interfant 06)
  - d) Intermediate risk infant ALL with MRD  $> 10^{-3}$  at end of Interfant06 induction
  - e) Very early (< 18 months from diagnosis) bone marrow or extramedullary relapse of acute lymphoblastic leukaemia (ALL)
  - f) Early (within 6 months of finishing therapy) bone marrow, or combined extramedullary relapse of ALL with bone marrow minimal residual disease (MRD)  $> 10^{-3}$  at end of re-induction
  - g) Any on therapy relapse of ALL in patients age 16-24
  - h) Any relapse of infant ALL
  - i) ALL post  $\geq$  2nd relapse
  - j) Any refractory relapse of ALL
  - k) ALL with MRD  $> 10^{-4}$  prior to planned stem cell transplant
  - l) Any relapse of ALL eligible for stem cell transplant but no available HLA matched donor or other contraindication to transplant
  - m) Any relapse of ALL after stem cell transplant
  - n) Any relapse of Burkitt's or other CD19+ lymphoma
2. Agreement to have a pregnancy test, use adequate contraception (if applicable)
3. Written informed consent

### **Exclusion Criteria for registration**

1. CD19 negative disease
2. Active hepatitis B, C or HIV infection
3. Oxygen saturation  $\leq$  90% on air
4. Bilirubin  $> 3 \times$  upper limit of normal
5. Creatinine  $> 3 \times$  upper limit of normal
6. Women who are pregnant or lactating
7. Stem Cell Transplant patients only: active significant acute GVHD (overall Grade  $\geq$  II, Seattle criteria) or moderate/severe chronic GVHD (NIH consensus criteria) requiring systemic steroids
8. Inability to tolerate leucapheresis
9. Karnofsky (age  $\geq$  10 years) or Lansky (age < 10) score  $\leq$  50%
10. Pre-existing significant neurological disorder (other than CNS involvement of underlying haematological malignancy)

### **Exclusion criteria for CD19CAR T-cell infusion**

1. Severe intercurrent infection at the time of scheduled CD19CAR T-cell infusion
2. Requirement for supplementary oxygen or active pulmonary infiltrates at the time of scheduled CD19CAR T-cell infusion
3. Allogeneic transplant recipients with active significant acute GVHD overall grade  $> 2$  or moderate/severe chronic GVHD requiring systemic steroids at the time of scheduled CD19CAR T-cell infusion

### **Supplementary Table 1. Study inclusion criteria**

| <b>Baseline characteristics</b>               | <b>N (%)</b><br><b>N=14</b> |
|-----------------------------------------------|-----------------------------|
| <b>Age, in years</b>                          |                             |
| N                                             | 14 (100%)                   |
| Median (range)                                | 9.24 (1.35 to 19.28)        |
| <b>Sex</b>                                    |                             |
| Female                                        | 1 (7%)                      |
| Male                                          | 13 (93%)                    |
| <b>ALL cytogenetics at diagnosis</b>          |                             |
| Normal                                        | 1 (7%)                      |
| t(9,22)                                       | 1 (7%)                      |
| MLL rearrangement                             | 2 (14%)                     |
| Other abnormal                                | 9 (64%)                     |
| ND                                            | 1 (7%)                      |
| <b>Status at registration</b>                 |                             |
| 1st relapse                                   | 1 (7%)                      |
| 2nd relapse                                   | 8 (57%)                     |
| >2nd relapse                                  | 5 (36%)                     |
| Very early relapse                            | 5 (36%)                     |
| Relapse post SCT                              | 10 (71%)                    |
| <b>CNS disease at relapse</b>                 |                             |
| 1 <sup>st</sup> relapse                       | 5 (36%)                     |
| 2 <sup>nd</sup> relapse                       | 3 (21%)                     |
| Post SCT relapse                              | 6 (43%)                     |
| <b>Lines of treatment</b>                     |                             |
| Median (range)                                | 4 (2-7)                     |
| Prior inotuzumab                              | 2 (14%)                     |
| Prior blinatumomab                            | 1 (7%)                      |
| <b>Tumour burden prior to lymphodepletion</b> |                             |
| Morphological disease                         |                             |
| > 5 % blasts                                  | 4 (21%)                     |
| ≤ 5% blasts                                   | 10 (79%)                    |
| MRD by IgH PCR/flow cytometry                 |                             |
| > 10 <sup>-5</sup> to ≤ 10 <sup>-4</sup>      | 1 (10%)                     |
| > 10 <sup>-4</sup> to ≤ 10 <sup>-3</sup>      | 3 (30%)                     |
| > 10 <sup>-3</sup> to ≤ 10 <sup>-2</sup>      | 1 (10%)                     |
| > 10 <sup>-2</sup>                            | 1 (10%)                     |
| Negative                                      | 4 (40%)                     |
| <b>CNS status at registration</b>             |                             |
| CNS I                                         | 12 (86%)                    |
| CNS II-III                                    | 2 (14%)                     |

**Supplementary Table 2. Summary of Clinical Characteristics of Infused Patients**

| BASELINE CHARACTERISTICS |           |                |                | BM STATUS AT LYMPHODEPLETION |                | BM STATUS AT INFUSION |                | CNS STATUS          | CRS                           |                             |                                                         |                                |                                |                     |           |                             | MAX GRADE NEUROTOXICITY                  | BEST OUTCOME BY D90 | OUTCOME AT LAST FOLLOW UP                | DURATION OF F/U (DAYS) | B CELL APLASIA AT LAST F/U | CAR T CELL DETECTION AT LAST F/U (qPCR) |
|--------------------------|-----------|----------------|----------------|------------------------------|----------------|-----------------------|----------------|---------------------|-------------------------------|-----------------------------|---------------------------------------------------------|--------------------------------|--------------------------------|---------------------|-----------|-----------------------------|------------------------------------------|---------------------|------------------------------------------|------------------------|----------------------------|-----------------------------------------|
| PATIENT                  | AGE (YRS) | NO OF RELAPSES | PRIOR ALLO SCT | % BLASTS                     | MRD BY IGH PCR | % BLASTS              | MRD BY IGH PCR |                     | MAX CRS GRADE BY LEE CRITERIA | MAX GRADE BY UPENN CRITERIA | HYPOTENSION DUE TO CRS REQUIRING MULTIPLE FLUID BOLUSES | OXYGEN REQUIREMENT (<40% FIO2) | COAGULOPATHY REQUIRING SUPPORT | VENTILATORY SUPPORT | INOTROPES | SOURCE OF SEPSIS DURING CRS |                                          |                     |                                          |                        |                            |                                         |
| CPL-01                   | 1.4       | 2              | Yes            | 1 (FISH)                     | ND             | ND                    | ND             | Ongoing CNS disease | 2                             | 2                           | No                                                      | No                             | No                             | No                  | No        | Fungal chest infection      | None                                     | Stable disease      | Death due to progressive (CD19+) disease | 28                     | Y                          | Yes                                     |
| CPL-02                   | 15.8      | 2              | Yes            | 17                           | >10-2          | 88                    | ND             | Clear               | 2                             | 3                           | Yes                                                     | No                             | No                             | No                  | No        | Fungal chest infection      | None                                     | Molecular CR/CRi    | CD19 - relapse                           | 189                    | Y                          | Yes                                     |
| CPL-04                   | 17.2      | 2              | Yes            | 3                            | Negative       | 1                     | Negative       | Ongoing CNS disease | 1                             | 1                           | N/A                                                     | N/A                            | N/A                            | No                  | No        | Device related infection    | Grade 2 Dysarthria, Dysphasia, Nystagmus | Molecular CR/CRi    | Ongoing molecular CR                     | 689                    | Y                          | Yes                                     |
| CPL-05                   | 11.3      | 2              | Yes            | 81 (flow)                    | >10-2          | 40                    | ND             | Clear               | 2                             | 3                           | Yes                                                     | Yes                            | Yes                            | No                  | No        | None                        | Grade 2 Encephalopathy                   | Molecular CR/CRi    | CD19-relapse                             | 91                     | Y                          | Yes                                     |
| CPL-06                   | 7.9       | >2             | Yes            | 3                            | > 10-4 to 10-3 | 0                     | > 10-4 to 10-3 | Clear               | 1                             | 1                           | N/A                                                     | N/A                            | N/A                            | No                  | No        | None                        | Grade 1 Ataxia                           | Molecular CR/CRi    | Ongoing molecular CR                     | 728                    | Y                          | Yes                                     |
| CPL-07                   | 7.3       | 2              | Yes            | 0                            | > 10-3 to 10-2 | 0                     | > 10-3 to 10-2 | Clear               | 1                             | 1                           | N/A                                                     | N/A                            | N/A                            | No                  | No        | None                        | None                                     | Molecular CR/CRi    | CD19-relapse                             | 401                    | N/A                        | Yes                                     |
| CPL-08                   | 4.3       | 1 (very early) | No             | 50 (flow)                    | >10-2          | 1 (flow)              | >10-2          | Clear               | 1                             | 1                           | N/A                                                     | N/A                            | N/A                            | No                  | No        | None                        | Grade 1 Dysarthria                       | Molecular CR/CRi    | CD19-relapse                             | 366                    | Y                          | Yes                                     |
| CPL-09                   | 6.9       | >2             | No             | 35                           | 10-5 to 10-4   | 58                    | 10-5 to 10-4   | Clear               | 2                             | 3                           | No                                                      | Yes                            | No                             | No                  | No        | None                        | None                                     | Molecular CR/CRi    | CD19-relapse                             | 362                    | N/A                        | Yes                                     |
| CPL-10                   | 10.6      | 2              | Yes            | 0.5                          | > 10-4 to 10-3 | 0                     | 10-5 to 10-4   | Clear               | 1                             | 1                           | N/A                                                     | N/A                            | N/A                            | No                  | No        | None                        | Grade 1 Tremor                           | Molecular CR/CRi    | CD19+ relapse                            | 359                    | Y                          | No                                      |
| CPL-11                   | 7.4       | 2              | No             | 0                            | Negative       | 0                     | Negative       | Clear               | 1                             | 1                           | N/A                                                     | N/A                            | N/A                            | No                  | No        | None                        | None                                     | Molecular CR/CRi    | Ongoing molecular CR                     | 357                    | Y                          | Yes                                     |
| CPL-12                   | 19.3      | >2             | Yes            | 1                            | Negative       | ND                    | ND             | Clear               | 0                             | 0                           | N/A                                                     | N/A                            | N/A                            | No                  | No        | N/A                         | Grade 4 encephalopathy                   | Molecular CR/CRi    | Death in CR                              | 119                    | Y                          | No                                      |
| CPL-14                   | 13.5      | >2             | Yes            | 1                            | Negative       | ND                    | Negative       | Clear               | 1                             | 1                           | N/A                                                     | N/A                            | N/A                            | No                  | No        | None                        | Grade 2 parasthesiae                     | Molecular CR/CRi    | Ongoing molecular CR                     | 273                    | Y                          | Yes                                     |
| CPL-15                   | 3.3       | >2             | Yes            | 0.01 (flow)                  | > 10-4 to 10-3 | 0                     | 10-5 to 10-4   | Clear               | 1                             | 1                           | N/A                                                     | N/A                            | N/A                            | No                  | No        | None                        | None                                     | SD                  | Alive with (CD19+) disease               | 28                     | No                         | No                                      |
| CPL-17                   | 13.1      | 2              | No             | 1                            | 10-5 to 10-4   | 0                     | Negative       | Clear               | 1                             | 1                           | N/A                                                     | N/A                            | N/A                            | No                  | No        | None                        | None                                     | Molecular CR/CRi    | Ongoing molecular CR                     | 119                    | Y                          | No                                      |

**Supplementary Table 3. Characteristics and outcomes of CARPALL study patients.**

FISH – Fluorescence in situ hybridization, N/D not done, N/A not applicable, CR complete remission, CRi complete remission with incomplete hematological recovery, SD stable disease

| Adverse events      | Any time point | Within 60 days | After 60 days |
|---------------------|----------------|----------------|---------------|
|                     | N (%)<br>N=14  | N (%)<br>N=14  | N (%)<br>N=12 |
| Any AE of any grade | 14 (100%)      | 14 (100%)      | 9 (75%)       |
| Related to ATIMP    | 14 (100%)      | 14 (100%)      | 7 (58%)       |
| Any grade 3-5 AE    | 14 (100%)      | 14 (100%)      | 9 (75%)       |
| Related to ATIMP    | 11 (79%)       | 11 (79%)       | 7 (58%)       |

**Supplementary Table 4. Summary of adverse events by severity and relation to CAR T cell infusion**

| Patient     | CPL-01 | CPL-02  | CPL-04 | CPL-05  | CPL-06  | CPL-07  | CPL-08 | CPL-09  | CPL-10  | CPL-11  | CPL-12  | CPL-14  | CPL-15  | CPL-17  |
|-------------|--------|---------|--------|---------|---------|---------|--------|---------|---------|---------|---------|---------|---------|---------|
| EGF         | 10     | 35.92   | 46.44  | 63.4    | 6.32    | 5.8     | 6.68   | 5.8     | 5.8     | 5.8     | 5.8     | 5.8     | 5.8     | 8.8     |
| Eotaxin     | 41.16  | 78.04   | 45.48  | 78.48   | 120.2   | 57.76   | 105.88 | 205.2   | 51.76   | 57.76   | 137.2   | 151.12  | 48.72   | 80.16   |
| FGF-basic   | 28.48  | 25.64   | 6320   | 28.48   | 40.12   | 33.64   | 43.56  | 28.64   | 33.64   | 408.4   | 23.64   | 314.64  | 43.56   | 534.2   |
| G-CSF/CSF-3 | 35188  | 2705.72 | 1289.2 | 442.84  | 121.2   | 218.56  | 218.56 | 218.56  | 218.56  | 218.56  | 698.84  | 294.08  | 218.56  | 218.56  |
| GM-CSF      | 10     | 35.92   | 46.44  | 63.4    | 6.32    | 5.8     | 6.68   | 5.8     | 5.8     | 5.8     | 5.8     | 5.8     | 5.8     | 8.8     |
| HGF         | 2013.2 | 1389.12 | 133320 | 2086    | 321.2   | 976.56  | 371.72 | 2196.48 | 574.4   | 4064    | 493.12  | 7288    | 655.56  | 9068    |
| IFN-a       | 59.36  | 17.92   | 1842   | 20      | 17.92   | 52.72   | 68.12  | 280     | 52.72   | 126.72  | 25.68   | 907.88  | 52.72   | 472     |
| IFN-g       | 7.52   | 28.56   | 13.04  | 62.2    | 7.52    | 7.88    | 8.96   | 16.16   | 12.12   | 7.88    | 7.88    | 8.96    | 7.88    | 8       |
| IL-10       | 110.8  | 183.28  | 159.16 | 392.48  | 30.2    | 80.04   | 299.2  | 383.52  | 87.04   | 30.16   | 19.8    | 87.04   | 43.8    | 48.96   |
| IL-12       | 30.36  | 26.2    | 8100   | 71.96   | 107.64  | 247     | 223.6  | 102.96  | 206     | 155.84  | 123.4   | 438.6   | 310.4   | 592.2   |
| IL-13       | 32.96  | 32.96   | 73     | 32.96   | 32.96   | 32.96   | 32.96  | 27.36   | 27.36   | 31.12   | 19.96   | 38.56   | 31.12   | 101.04  |
| IL-15       | 583.08 | 351.28  | 5824   | 140.56  | 36.84   | 93.04   | 93.04  | 385.04  | 70.72   | 103.08  | 191     | 1000.12 | 53.12   | 458.88  |
| IL-17A      | 458.88 | 36.44   | 36.44  | 36.44   | 36.44   | 30.84   | 30.84  | 30.84   | 30.84   | 30.84   | 30.84   | 30.84   | 30.84   | 30.84   |
| IL-1beta    | 26.24  | 26.24   | 57.16  | 26.24   | 26.24   | 31.4    | 31.4   | 31.4    | 31.4    | 31.4    | 31.4    | 31.4    | 31.4    | 31.4    |
| IL-1RA      | 173.84 | 992.28  | 28368  | 2180.8  | 115.36  | 495.52  | 246.96 | 1031.32 | 744.12  | 2765.16 | 68.32   | 1392.64 | 186.8   | 1046.12 |
| IL-2        | 22.6   | 42.44   | 7896   | 12.6    | 12.6    | 20.16   | 22.88  | 91.12   | 22.88   | 76.12   | 12.64   | 898.92  | 17.52   | 419.32  |
| IL-2R       | 8240   | 11828   | 11736  | 24112   | 519.64  | 736.96  | 5164   | 5456    | 11440   | 833     | 978.2   | 1221.48 | 953.92  | 881.28  |
| IL-4        | 109.64 | 109.64  | 15004  | 109.64  | 109.64  | 107.2   | 107.2  | 107.2   | 107.2   | 358.32  | 107.2   | 312.8   | 107.2   | 349.2   |
| IL-5        | 27.8   | 27.8    | 27.8   | 88.6    | 28.96   | 28.96   | 28.96  | 28.96   | 28.96   | 28.96   | 28.96   | 28.96   | 28.96   | 28.96   |
| IL-6        | 927.88 | 12280   | 15228  | 1772.76 | 38.52   | 87.36   | 372    | 497.56  | 136.44  | 33.44   | 433.76  | 38.36   | 29.56   | 47.48   |
| IL-7        | 71.6   | 29.04   | 60.68  | 41      | 27.28   | 53.56   | 53.56  | 46.88   | 4.32    | 53.56   | 40.32   | 60.28   | 53.56   | 117.56  |
| IL-8        | 3435.6 | 2330    | 346    | 2022.84 | 44.32   | 184.12  | 233.48 | 659.44  | 154     | 134.64  | 335.64  | 165.16  | 43.6    | 90.08   |
| IP-10       | 102.24 | 236.68  | 121.8  | 247.32  | 16      | 74.44   | 89.6   | 191.16  | 199.4   | 22.6    | 39.72   | 63      | 41      | 57.4    |
| MCP-1       | 15228  | 16544   | 31584  | 10612   | 2217.76 | 3745.04 | 6568   | 15068   | 4652    | 6080    | 18408   | 4840    | 2114.52 | 5060    |
| MIG         | 397.08 | 1062.72 | 646.4  | 1310.08 | 216.8   | 175.72  | 983.72 | 1463.08 | 1843.92 | 209.68  | 261.8   | 297.08  | 192.6   | 332.64  |
| MIP-1alpha  | 302.56 | 124.64  | 13844  | 112.08  | 61.44   | 101.32  | 130.92 | 174.56  | 130.92  | 793.68  | 244.96  | 1082.4  | 71.6    | 987.72  |
| MIP1-beta   | 431.04 | 776.36  | 18676  | 648.12  | 154.48  | 335.84  | 723.44 | 1581.84 | 188.6   | 689.6   | 1581.84 | 4680    | 335.84  | 2720.92 |
| RANTES      | 19108  | 17960   | 18328  | 19992   | 24204   | 17552   | 26288  | 13608   | 28868   | 24944   | 2718.88 | 27188   | 19328   | 31688   |
| TNF-a       | 5.24   | 4.84    | 69.32  | 5.04    | 4.84    | 9       | 9      | 9       | 9       | 9.92    | 9       | 18.52   | 9       | 9.92    |
| VEGF        | 3.36   | 2.48    | 10.16  | 0.84    | 5.84    | 10.48   | 14.36  | 2.08    | 4.24    | 1.92    | 1.72    | 1.72    | 3.56    | 10.96   |

**Supplementary Table 5. Maximum serum cytokine levels (in pg/ml) noted between day 0 (pre) and day 14 post CAR T cell infusion**



| Adverse events                                              | Maximum grade reported<br>N=14 |                  |
|-------------------------------------------------------------|--------------------------------|------------------|
|                                                             | Grade 3-5                      |                  |
|                                                             | All AEs                        | Related to ATIMP |
| <b>Abnormal laboratory parameters</b>                       |                                |                  |
| Anemia                                                      | 5 (36%)                        | 2 (14%)          |
| Lymphocyte count decreased                                  | 8 (57%)                        | 5 (36%)          |
| Neutrophil count decreased                                  | 13 (93%)                       | 9 (64%)          |
| Platelet count decreased                                    | 5 (36%)                        | 4 (29%)          |
| White blood cell decreased                                  | 7 (50%)                        | 3 (21%)          |
| Alanine aminotransferase increased                          | 2 (14%)                        |                  |
| Blood bilirubin increased                                   | 2 (14%)                        | 1 (7%)           |
| Bone marrow hypocellular                                    | 1 (7%)                         | 1 (7%)           |
| Hypernatremia                                               | 1 (7%)                         |                  |
| Hypokalemia                                                 | 1 (7%)                         |                  |
| <b>Blood and lymphatic system disorders</b>                 |                                |                  |
| Febrile neutropenia                                         | 8 (57%)                        | 7 (50%)          |
| <b>Cardiac disorders</b>                                    |                                |                  |
| Supraventricular tachycardia                                | 1 (7%)                         |                  |
| Hypotension                                                 | 3 (21%)                        | 3 (21%)          |
| Electrocardiogram QT corrected interval prolonged           | 1 (7%)                         |                  |
| <b>General disorders and administration site conditions</b> |                                |                  |
| Fatigue                                                     | 1 (7%)                         |                  |
| Fever                                                       | 4 (29%)                        | 4 (29%)          |
| <b>Infections and infestations</b>                          |                                |                  |
| Device related infection                                    | 2 (14%)                        | 1 (7%)           |
| Lung infection                                              | 2 (14%)                        | 1 (7%)           |
| Periorbital infection                                       | 1 (7%)                         | 1 (7%)           |
| Sepsis                                                      | 2 (14%)                        | 1 (7%)           |
| Upper respiratory infection                                 | 1 (7%)                         |                  |
| Other infections                                            | 1 (7%)                         |                  |
| <b>Injury, poisoning and procedural complications</b>       |                                |                  |
| Generalized muscle weakness                                 | 1 (7%)                         |                  |
| <b>Nervous system disorders</b>                             |                                |                  |
| Dysarthria                                                  | 1 (7%)                         |                  |
| Encephalopathy                                              | 1 (7%)                         | 1 (7%)           |
| Paresthesia                                                 | 1 (7%)                         |                  |
| Somnolence                                                  | 1 (7%)                         |                  |
| <b>Respiratory, thoracic and mediastinal disorders</b>      |                                |                  |
| Bronchopulmonary hemorrhage                                 | 1 (7%)                         | 1 (7%)           |
| Hypoxia                                                     | 2 (14%)                        | 2 (14%)          |
| <b>Skin and subcutaneous tissue disorders</b>               |                                |                  |
| Rash maculo-papular                                         | 1 (7%)                         | 1 (7%)           |
| <b>Any adverse event</b>                                    |                                |                  |
| Any adverse event                                           | 14 (100%)                      | 11 (79%)         |

**Supplementary Table 6. Summary of severe (grade 3-5) adverse events by system and relation to CAR T cell infusion**

| Patient      | %MRD at CD19neg relapse | Nucleotide position (chromosome 16) | Location of mutation in CD19 gene | Mutation type | Effect           | VAF at diagnosis | VAF CD19 neg relapse |
|--------------|-------------------------|-------------------------------------|-----------------------------------|---------------|------------------|------------------|----------------------|
| <b>CPL02</b> | 99%                     | g.28932553C>CG                      | Exon 2                            | INS           | Frameshift (LOF) | 0                | 0.18                 |
|              |                         | g.28933331C>CA                      | Exon 4                            | INS           | Frameshift (LOF) | 0                | 0.14                 |
| <b>CPL05</b> | 100%                    | g.28932411T>C                       | Exon 2                            | SNV           | Missense         | 0                | 0.37                 |
|              |                         | g.28932413G>A                       | Exon 2                            | SNV           | Stop gain (LOF)  | 0                | 0.28                 |
|              |                         | g.28932439T>C                       | Exon 2                            | SNV           | Missense         | 0                | 0.03                 |
|              |                         | g.28933043G>T                       | Exon 3                            | SNV           | Missense         | 0                | 0.30                 |
|              |                         | g.28936557G>A                       | Exon 7                            | SNV           | Synonymous       | 0                | 0.04                 |
| <b>CPL07</b> | 20%                     | g.28933075C>G                       | Exon 3                            | SNV           | Missense         | 0.42             | 0.85                 |
| <b>CPL08</b> | 50%                     | g.28933074T>TGTAAG                  | Exon 3                            | INS           | Frameshift (LOF) | 0                | 0.15                 |
| <b>CPL09</b> | 6%                      | g.28933086G>A                       | Exon 3                            | SNV           | Synonymous       | 0                | 0.05                 |
|              |                         | g.28938895G>A                       | Exon 14                           | SNV           | Missense         | 0                | 0.03                 |

**Supplementary Table 7. Summary of mutations associated with CD19- relapse**
